# Supplementary material for: North Atlantic Migratory Bird Flyways Provide Routes for Intercontinental Movement of Avian Influenza Viruses
Source: PLoS One. 2014 Mar 19;9(3):e92075. doi: 10.1371/journal.pone.0092075 (PMC3960164; doi:10.1371/journal.pone.0092075)
Supplement: Table S2 — Results of standard nucleotide Basic Local Allignment Search Tool (BLAST) conducted using GenBank for each virus segment we detected in Iceland, 2010–2011. (XLSX) [file pone.0092075.s021.xlsx]

## Sheet: Primary BLAST Result
Table S2. Results of standard nucleotide Basic Local Allignment Search Tool (BLAST) conducted using GenBank for each virus segment we detected in Iceland, 2010 - 2011. Only the top most similar result shown for each segment.
		GenBank BLAST result
Iceland sample	Segment	Description	Max score	Total score	Query cover	E value	Identity	Accession	GenBank Accessed
A/lesser black-backed gull/Iceland/145/2010(H11N2)	PB2	A/black headed gull/Mongolia/1766/2006(H13N6)	3916	3916	1	0	0.97	GQ907309.1	2013-11-22
A/black-headed gull/Iceland/1298/2011(H10N5)	PB2	A/mallard/Netherlands/20/2005(H12N8)	3829	3829	1	0	0.97	CY076975.1	2013-11-22
A/black-headed gull/Iceland/713/2010(H16N3)	PB2	A/herring gull/Mongolia/454/2008(H13N8)	3807	3807	0.98	0	0.97	JF775477.1	2013-11-22
A/glaucous gull-herring gull hybrid/Iceland/1108/2011(H16N3)	PB2	A/herring gull/Mongolia/454/2008(H13N8)	3768	3768	1	0	0.96	JF775477.1	2013-11-22
A/glaucous gull/Iceland/1382/2011(H2N5)	PB2	A/ruddy turnstone/Canada/02937/2011(H3N5)	4233	4233	1	0	0.99	CY149651.1	2013-11-22
A/herring gull/Iceland/1359/2011(H2N5)	PB2	A/ruddy turnstone/Canada/02937/2011(H3N5)	4239	4239	1	0	0.99	CY149651.1	2013-11-22
A/Iceland gull/Iceland/1124/2011(H2N5)	PB2	A/ruddy turnstone/Canada/02937/2011(H3N5)	4233	4233	1	0	0.99	CY149651.1	2013-11-22
A/glaucous gull/Iceland/1444/2011(H2N5)	PB2	A/ruddy turnstone/Canada/02937/2011(H3N5)	4228	4228	1	0	0.99	CY149651.1	2013-11-22
A/herring gull/Iceland/1394/2011(H2N5)	PB2	A/ruddy turnstone/Canada/02937/2011(H3N5)	4228	4228	1	0	0.99	CY149651.1	2013-11-22
A/herring gull/Iceland/1342/2011(H2N5)	PB2	A/ruddy turnstone/Canada/02937/2011(H3N5)	4233	4233	1	0	0.99	CY149651.1	2013-11-22
A/herring gull/Iceland/1320/2011(H2N5)	PB2	A/ruddy turnstone/Canada/02937/2011(H3N5)	4233	4233	1	0	0.99	CY149651.1	2013-11-22
A/herring gull/Iceland/1393/2011(H2N5)	PB2	A/ruddy turnstone/Canada/02937/2011(H3N5)	4233	4233	1	0	0.99	CY149651.1	2013-11-22
A/herring gull/Iceland/1395/2011(H2N5)	PB2	A/ruddy turnstone/Canada/02937/2011(H3N5)	4233	4233	1	0	0.99	CY149651.1	2013-11-22
A/herring gull/Iceland/1436/2011(H2N5)	PB3	A/ruddy turnstone/Canada/02937/2011(H3N5)	4233	4233	1	0	0.99	CY149651.1	2013-11-22
A/great black-backed gull/Iceland/1113/2011(H4N8)	PB2	A/bufflehead/Maine/287/2011(H4N8)	4211	4211	1	0	1	CY149587.1	2013-11-22
A/greylag goose/Iceland/0911/2011(H6N8)	PB2	A/Anas crecca/Spain/1460/2008(H7N9)	4052	4052	1	0	0.98	HQ244404.1	2013-11-22
A/greylag goose/Iceland/0980/2011(H6N8)	PB2	A/Anas crecca/Spain/1460/2008(H7N9)	4047	4047	1	0	0.98	HQ244404.1	2013-11-22
A/greylag goose/Iceland/0976/2011(H6N8)	PB2	A/Anas crecca/Spain/1460/2008(H7N9)	4047	4047	1	0	0.98	HQ244404.1	2013-11-22
A/greylag goose/Iceland/0921/2011(H6N8)	PB2	A/Anas crecca/Spain/1460/2008(H7N9)	4047	4047	1	0	0.98	HQ244404.1	2013-11-22
A/greylag goose/Iceland/1482/2011(H6N8)	PB2	A/Anas crecca/Spain/1460/2008(H7N9)	4047	4047	1	0	0.98	HQ244404.1	2013-11-22
A/greylag goose/Iceland/1474/2011(H6N8)	PB2	A/Anas crecca/Spain/1460/2008(H7N9)	4047	4047	1	0	0.98	HQ244404.1	2013-11-22
A/pink-footed goose/Iceland/0987/2011(H6N8)	PB2	A/Anas crecca/Spain/1460/2008(H7N9)	4036	4036	1	0	0.98	HQ244404.1	2013-11-22
A/greylag goose/Iceland/0926/2011(H6N8)	PB2	A/Anas crecca/Spain/1460/2008(H7N9)	4047	4047	1	0	0.98	HQ244404.1	2013-11-22
A/greylag goose/Iceland/0961/2011(H6N8)	PB2	A/Anas crecca/Spain/1460/2008(H7N9)	4052	4052	1	0	0.98	HQ244404.1	2013-11-22
A/greylag goose/Iceland/0953/2011(H6N5)	PB2	A/mallard/Netherlands/1/2010(H2N3)	4119	4119	1	0	0.99	CY122315.1	2013-11-22
A/greylag goose/Iceland/0948/2011(H6N5)	PB2	A/mallard/Netherlands/1/2010(H2N3)	4119	4119	1	0	0.99	CY122315.1	2013-11-22
A/greylag goose/Iceland/1459/2011(H6N5)	PB2	A/mallard/Netherlands/1/2010(H2N3)	4130	4130	1	0	0.99	CY122315.1	2013-11-22
A/mallard/Iceland/1007/2011(H3N6)	PB2	A/mallard/Norway/10_779/2009(H3N8)	4156	4156	0.99	0	0.99	HE802728.1	2013-11-22
A/great black-backed gull/Iceland/1110/2011(H5N2)	PB2	A/mallard/Czech Republic/13577-24K/2010(H3N8)	4163	4163	1	0	0.99	JF789607.1	2013-11-22
A/lesser black-backed gull/Iceland/145/2010(H11N2)	PB1	A/mallard/Netherlands/14/2007(H2N2)	4028	4028	1	0	0.98	CY121981.1	2013-11-22
A/black-headed gull/Iceland/1298/2011(H10N5)	PB1	A/mallard/Minnesota/AI09-1829/2009(H3N8)	4061	4061	1	0	0.98	CY140661.1	2013-11-25
A/black-headed gull/Iceland/713/2010(H16N3)	PB1	A/common gull/Norway/10_1313/2009(H13N2)	3956	3956	1	0	0.98	HE802713.1	2013-11-25
A/glaucous gull/Iceland/1382/2011(H2N5)	PB1	A/white-rumped sandpiper/Canada/2541/2011(H2N5)	4233	4233	1	0	0.99	CY149642.1	2013-11-25
A/glaucous gull/Iceland/1444/2011(H2N5)	PB1	A/white-rumped sandpiper/Canada/2541/2011(H2N5)	4233	4233	1	0	0.99	CY149642.1	2013-11-25
A/glaucous gull-herring gull hybrid/Iceland/1108/2011(H16N3)	PB1	A/common gull/Norway/10_1313/2009(H13N2)	3923	3923	1	0	0.98	HE802713.1	2013-11-25
A/great black-backed gull/Iceland/1110/2011(H5N2)	PB1	A/mallard/Netherlands/29/2010(H2N3)	4065	4065	1	0	0.99	CY122298.1	2013-11-25
A/great black-backed gull/Iceland/1113/2011(H4N8)	PB1	A/bufflehead/Maine/287/2011(H4N8)	4235	4235	1	0	1	CY149586.1	2013-11-25
A/great black-backed gull/Iceland/1393/2011(H2N5)	PB1	A/white-rumped sandpiper/Canada/2541/2011(H2N5)	4233	4233	1	0	0.99	CY149642.1	2013-11-25
A/great black-backed gull/Iceland/1395/2011(H2N5)	PB1	A/white-rumped sandpiper/Canada/2541/2011(H2N5)	4228	4228	1	0	0.99	CY149642.1	2013-11-25
A/greylag goose/Iceland/0911/2011(H6N8)	PB1	A/turnstone/Netherlands/1/2007(H3N8)	4058	4058	1	0	0.99	CY041352.1	2013-11-25
A/greylag goose/Iceland/0961/2011(H6N8)	PB1	A/turnstone/Netherlands/1/2007(H3N8)	4058	4058	1	0	0.99	CY041352.1	2013-11-25
A/greylag goose/Iceland/0921/2011(H6N8)	PB1	A/turnstone/Netherlands/1/2007(H3N8)	4052	4052	1	0	0.99	CY041352.1	2013-11-25
A/greylag goose/Iceland/0926/2011(H6N8)	PB1	A/turnstone/Netherlands/1/2007(H3N8)	4052	4052	1	0	0.99	CY041352.1	2013-11-25
A/greylag goose/Iceland/0948/2011(H6N5)	PB1	A/duck/Yunnan/2908/2009(H11N9)	3989	3989	0.99	0	0.98	KF260532.1	2013-11-25
A/greylag goose/Iceland/0953/2011(H6N5)	PB1	A/duck/Yunnan/2908/2009(H11N9)	3989	3989	0.99	0	0.98	KF260532.1	2013-11-25
A/greylag goose/Iceland/0976/2011(H6N8)	PB1	A/turnstone/Netherlands/1/2007(H3N8)	4063	4063	1	0	0.99	CY041352.1	2013-11-25
A/greylag goose/Iceland/0980/2011(H6N8)	PB1	A/turnstone/Netherlands/1/2007(H3N8)	4047	4047	1	0	0.99	CY041352.1	2013-11-25
A/greylag goose/Iceland/1459/2011(H6N5)	PB1	A/duck/Yunnan/2908/2009(H11N9)	3989	3989	0.99	0	0.98	KF260532.1	2013-11-25
A/greylag goose/Iceland/1474/2011(H6N8)	PB1	A/turnstone/Netherlands/1/2007(H3N8)	4047	4047	1	0	0.99	CY041352.1	2013-11-25
A/greylag goose/Iceland/1482/2011(H6N8)	PB1	A/turnstone/Netherlands/1/2007(H3N8)	4058	4058	1	0	0.99	CY041352.1	2013-11-25
A/herring gull/Iceland/1320/2011(H2N5)	PB1	A/white-rumped sandpiper/Canada/2541/2011(H2N5)	4228	4228	1	0	0.99	CY149642.1	2013-11-25
A/herring gull/Iceland/1342/2011(H2N5)	PB1	A/white-rumped sandpiper/Canada/2541/2011(H2N5)	4228	4228	1	0	0.99	CY149642.1	2013-11-25
A/herring gull/Iceland/1359/2011(H2N5)	PB1	A/white-rumped sandpiper/Canada/2541/2011(H2N5)	4233	4233	1	0	0.99	CY149642.1	2013-11-25
A/herring gull/Iceland/1394/2011(H2N5)	PB1	A/white-rumped sandpiper/Canada/2541/2011(H2N5)	4233	4233	1	0	0.99	CY149642.1	2013-11-25
A/herring gull/Iceland/1436/2011(H2N5)	PB1	A/white-rumped sandpiper/Canada/2541/2011(H2N5)	4228	4228	1	0	0.99	CY149642.1	2013-11-25
A/Iceland gull/Iceland/1124/2011(H2N5)	PB1	A/white-rumped sandpiper/Canada/2541/2011(H2N5)	4228	4228	1	0	0.99	CY149642.1	2013-11-25
A/mallard/Iceland/1007/2011(H3N6)	PB1	A/mallard/Netherlands/29/2010(H2N3)	4104	4104	1	0	0.99	CY122298.1	2013-11-25
A/pink-footed goose/Iceland/0987/2011(H6N8)	PB1	A/turnstone/Netherlands/1/2007(H3N8)	4052	4052	1	0	0.99	CY041352.1	2013-11-25
A/lesser black-backed gull/Iceland/145/2010(H11N2)	PA	A/mallard/Netherlands/20/2005(H12N8)	3823	3823	1	0	0.98	CY076973.1	2013-11-22
A/black-headed gull/Iceland/1298/2011(H10N5)	PA	A/long-tailed duck/Wisconsin/10OS3915/2010(H3N6)	3999	3999	1	0	0.99	CY133550.1	2013-11-26
A/black-headed gull/Iceland/713/2010(H16N3)	PA	A/common gull/Norway/10_1313/2009(H13N2)	3823	3823	1	0	0.99	HE802714.1	2013-11-26
A/glaucous gull-herring gull hybrid/Iceland/1108/2011(H16N3)	PA	A/common gull/Norway/10_1313/2009(H13N2)	3818	3818	1	0	0.99	HE802714.1	2013-11-26
A/glaucous gull/Iceland/1382/2011(H2N5)	PA	A/white-rumped sandpiper/Canada/2541/2011(H2N5)	4023	4023	1	0	0.99	CY149641.1	2013-11-26
A/herring gull/Iceland/1359/2011(H2N5)	PA	A/white-rumped sandpiper/Canada/2541/2011(H2N5)	4023	4023	1	0	0.99	CY149641.1	2013-11-26
A/herring gull/Iceland/1320/2011(H2N5)	PA	A/white-rumped sandpiper/Canada/2541/2011(H2N5)	4023	4023	1	0	0.99	CY149641.1	2013-11-26
A/Iceland gull/Iceland/1124/2011(H2N5)	PA	A/white-rumped sandpiper/Canada/2541/2011(H2N5)	4017	4017	1	0	0.99	CY149641.1	2013-11-26
A/great black-backed gull/Iceland/1393/2011(H2N5)	PA	A/white-rumped sandpiper/Canada/2541/2011(H2N5)	4017	4017	1	0	0.99	CY149641.1	2013-11-26
A/herring gull/Iceland/1394/2011(H2N5)	PA	A/white-rumped sandpiper/Canada/2541/2011(H2N5)	4017	4017	1	0	0.99	CY149641.1	2013-11-26
A/glaucous gull/Iceland/1444/2011(H2N5)	PA	A/white-rumped sandpiper/Canada/2541/2011(H2N5)	4017	4017	1	0	0.99	CY149641.1	2013-11-26
A/great black-backed gull/Iceland/1395/2011(H2N5)	PA	A/white-rumped sandpiper/Canada/2541/2011(H2N5)	4017	4017	1	0	0.99	CY149641.1	2013-11-26
A/herring gull/Iceland/1436/2011(H2N5)	PA	A/white-rumped sandpiper/Canada/2541/2011(H2N5)	4017	4017	1	0	0.99	CY149641.1	2013-11-26
A/herring gull/Iceland/1342/2011(H2N5)	PA	A/white-rumped sandpiper/Canada/2541/2011(H2N5)	4017	4017	1	0	0.99	CY149641.1	2013-11-26
A/great black-backed gull/Iceland/1110/2011(H5N2)	PA	A/mallard/Sweden/70/2002(H2N3)	3762	3762	1	0	0.98	CY122104.1	2013-11-26
A/great black-backed gull/Iceland/1113/2011(H4N8)	PA	A/bufflehead/Maine/287/2011(H4N8)	4065	4065	0.99	0	1	CY149585.1	2013-11-26
A/greylag goose/Iceland/0911/2011(H6N8)	PA	A/garganey/Altai/1213/2007(H5N2)	3890	3890	1	0	0.99	CY049771.1	2013-11-26
A/greylag goose/Iceland/0976/2011(H6N8)	PA	A/garganey/Altai/1213/2007(H5N2)	3890	3890	1	0	0.99	CY049771.1	2013-11-26
A/greylag goose/Iceland/0921/2011(H6N8)	PA	A/garganey/Altai/1213/2007(H5N2)	3895	3895	1	0	0.99	CY049771.1	2013-11-26
A/greylag goose/Iceland/0980/2011(H6N8)	PA	A/garganey/Altai/1213/2007(H5N2)	3895	3895	1	0	0.99	CY049771.1	2013-11-26
A/pink-footed goose/Iceland/0987/2011(H6N8)	PA	A/garganey/Altai/1213/2007(H5N2)	3895	3895	1	0	0.99	CY049771.1	2013-11-26
A/greylag goose/Iceland/1482/2011(H6N8)	PA	A/garganey/Altai/1213/2007(H5N2)	3884	3884	1	0	0.99	CY049771.1	2013-11-26
A/greylag goose/Iceland/0980/2011(H6N8)	PA	A/garganey/Altai/1213/2007(H5N2)	3884	3884	1	0	0.99	CY049771.1	2013-11-26
A/greylag goose/Iceland/1474/2011(H6N8)	PA	A/garganey/Altai/1213/2007(H5N2)	3873	3873	1	0	0.98	CY049771.1	2013-11-26
A/greylag goose/Iceland/0961/2011(H6N8)	PA	A/garganey/Altai/1213/2007(H5N2)	3801	3801	1	0	0.99	CY049771.1	2013-11-26
A/greylag goose/Iceland/0948/2011(H6N5)	PA	A/common gull/Norway/10_1602/2009(H6N8)	3808	3808	0.99	0	0.98	HE802706.1	2013-11-26
A/greylag goose/Iceland/1459/2011(H6N5)	PA	A/common gull/Norway/10_1602/2009(H6N8)	3808	3808	0.99	0	0.98	HE802706.1	2013-11-26
A/greylag goose/Iceland/0953/2011(H6N5)	PA	A/common gull/Norway/10_1602/2009(H6N8)	3783	3783	0.99	0	0.98	HE802706.1	2013-11-26
A/mallard/Iceland/1007/2011(H3N6)	PA	A/snow goose/Mongolia/1-44/2008(H3N8)	3812	3812	0.98	0	0.99	JN029669.1	2013-11-26
A/black-headed gull/Iceland/1298/2011(H10N5)	HA	A/mallard/Wisconsin/4230/2009(H10N1)	2952	2952	1	0	0.98	CY097301.1	2013-11-26
A/black-headed gull/Iceland/713/2010(H16N3)	HA	A/herring gull/Newfoundland/GR032/2010(H16N3)	3092	3092	0.99	0	0.99	KC845043.1	2013-11-26
A/glaucous gull-herring gull hybrid/Iceland/1108/2011(H16N3)	HA	A/herring gull/Newfoundland/GR032/2010(H16N3)	3037	3037	0.99	0	0.98	KC845043.1	2013-11-26
A/herring gull/Iceland/1359/2011(H2N5)	HA	A/white-rumped sandpiper/Canada/2541/2011(H2N5)	3177	3177	1	0	0.99	CY149636.1	2013-11-26
A/glaucous gull/Iceland/1382/2011(H2N5)	HA	A/white-rumped sandpiper/Canada/2541/2011(H2N5)	3177	3177	1	0	0.99	CY149636.1	2013-11-26
A/herring gull/Iceland/1394/2011(H2N5)	HA	A/white-rumped sandpiper/Canada/2541/2011(H2N5)	3177	3177	1	0	0.99	CY149636.1	2013-11-26
A/herring gull/Iceland/1436/2011(H2N5)	HA	A/white-rumped sandpiper/Canada/2541/2011(H2N5)	3171	3171	1	0	0.99	CY149636.1	2013-11-26
A/great black-backed gull/Iceland/1393/2011(H2N5)	HA	A/white-rumped sandpiper/Canada/2541/2011(H2N5)	3171	3171	1	0	0.99	CY149636.1	2013-11-26
A/Iceland gull/Iceland/1124/2011(H2N5)	HA	A/white-rumped sandpiper/Canada/2541/2011(H2N5)	3171	3171	1	0	0.99	CY149636.1	2013-11-26
A/great black-backed gull/Iceland/1395/2011(H2N5)	HA	A/white-rumped sandpiper/Canada/2541/2011(H2N5)	3171	3171	1	0	0.99	CY149636.1	2013-11-26
A/herring gull/Iceland/1342/2011(H2N5)	HA	A/white-rumped sandpiper/Canada/2541/2011(H2N5)	3182	3182	1	0	0.99	CY149636.1	2013-11-26
A/herring gull/Iceland/1320/2011(H2N5)	HA	A/white-rumped sandpiper/Canada/2541/2011(H2N5)	3182	3182	1	0	0.99	CY149636.1	2013-11-26
A/glaucous gull/Iceland/1444/2011(H2N5)	HA	A/white-rumped sandpiper/Canada/2541/2011(H2N5)	3171	3171	1	0	0.99	CY149636.1	2013-11-26
A/great black-backed gull/Iceland/1110/2011(H5N2)	HA	A/mallard/Czech Republic/15008-11K/2009(H5N3)	2981	2981	1	0	0.98	JQ737229.1	2013-11-26
A/great black-backed gull/Iceland/1113/2011(H4N8)	HA	A/bufflehead/Maine/287/2011(H4N8)	3164	3164	1	0	1	CY149580.1	2013-11-26
A/greylag goose/Iceland/0911/2011(H6N8)	HA	A/mallard/Netherlands/11/2007(H6N5)	3037	3037	1	0	0.99	CY041402.1	2013-11-26
A/greylag goose/Iceland/0921/2011(H6N8)	HA	A/mallard/Netherlands/11/2007(H6N5)	3042	3042	1	0	0.99	CY041402.1	2013-11-26
A/greylag goose/Iceland/0926/2011(H6N8)	HA	A/mallard/Netherlands/11/2007(H6N5)	3042	3042	1	0	0.99	CY041402.1	2013-11-26
A/pink-footed goose/Iceland/0987/2011(H6N8)	HA	A/mallard/Netherlands/11/2007(H6N5)	3042	3042	1	0	0.99	CY041402.1	2013-11-26
A/greylag goose/Iceland/0980/2011(H6N8)	HA	A/mallard/Netherlands/11/2007(H6N5)	3037	3037	1	0	0.99	CY041402.1	2013-11-26
A/greylag goose/Iceland/0976/2011(H6N8)	HA	A/mallard/Netherlands/11/2007(H6N5)	3037	3037	1	0	0.99	CY041402.1	2013-11-26
A/greylag goose/Iceland/0961/2011(H6N8)	HA	A/mallard/Netherlands/11/2007(H6N5)	3037	3037	1	0	0.99	CY041402.1	2013-11-26
A/greylag goose/Iceland/1482/2011(H6N8)	HA	A/mallard/Netherlands/11/2007(H6N5)	3037	3037	1	0	0.99	CY041402.1	2013-11-26
A/greylag goose/Iceland/1474/2011(H6N8)	HA	A/mallard/Netherlands/11/2007(H6N5)	3037	3037	1	0	0.99	CY041402.1	2013-11-26
A/greylag goose/Iceland/0953/2011(H6N5)	HA	A/mallard/Netherlands/11/2007(H6N5)	3009	3009	1	0	0.98	CY041402.1	2013-11-26
A/greylag goose/Iceland/0948/2011(H6N5)	HA	A/mallard/Netherlands/11/2007(H6N5)	3009	3009	1	0	0.98	CY041402.1	2013-11-26
A/greylag goose/Iceland/1459/2011(H6N5)	HA	A/mallard/Netherlands/11/2007(H6N5)	3009	3009	1	0	0.98	CY041402.1	2013-11-26
A/lesser black-backed gull/Iceland/145/2010(H11N2)	HA	A/shorebird/Delaware Bay/549/2009(H11N1)	3110	3110	1	0	0.99	CY127887.1	2013-11-26
A/mallard/Iceland/1007/2011(H3N6)	HA	A/mallard/Netherlands/3/2005(H3N8)	2929	2929	1	0	0.97	CY041242.1	2013-11-26
A/great black-backed gull/Iceland/1113/2011(H4N8)	NA	A/bufflehead/Maine/287/2011(H4N8)	2604	2604	1	0	0.99	CY149582.1	2013-11-26
A/black-headed gull/Iceland/1298/2011(H10N5)	NA	A/mallard/Sweden/100103/2009(H12N5)	2499	2499	1	0	0.98	JX566218.1	2013-11-26
A/black-headed gull/Iceland/713/2010(H16N3)	NA	A/black headed gull/Mongolia/1756/2006(H16N3)	2457	2457	1	0	0.98	GQ907296.1	2013-11-26
A/glaucous gull-herring gull hybrid/Iceland/1108/2011(H16N3)	NA	A/black headed gull/Mongolia/1756/2006(H16N3)	2399	2399	1	0	0.97	GQ907296.1	2013-11-26
A/herring gull/Iceland/1359/2011(H2N5)	NA	A/white-rumped sandpiper/Canada/2541/2011(H2N5)	2625	2625	1	0	0.99	CY149638.1	2013-11-26
A/Iceland gull/Iceland/1124/2011(H2N5)	NA	A/white-rumped sandpiper/Canada/2541/2011(H2N5)	2625	2625	1	0	0.99	CY149638.1	2013-11-26
A/glaucous gull/Iceland/1382/2011(H2N5)	NA	A/white-rumped sandpiper/Canada/2541/2011(H2N5)	2625	2625	1	0	0.99	CY149638.1	2013-11-26
A/herring gull/Iceland/1394/2011(H2N5)	NA	A/white-rumped sandpiper/Canada/2541/2011(H2N5)	2625	2625	1	0	0.99	CY149638.1	2013-11-26
A/great black-backed gull/Iceland/1395/2011(H2N5)	NA	A/white-rumped sandpiper/Canada/2541/2011(H2N5)	2625	2625	1	0	0.99	CY149638.1	2013-11-26
A/herring gull/Iceland/1436/2011(H2N5)	NA	A/white-rumped sandpiper/Canada/2541/2011(H2N5)	2625	2625	1	0	0.99	CY149638.1	2013-11-26
A/glaucous gull/Iceland/1444/2011(H2N5)	NA	A/white-rumped sandpiper/Canada/2541/2011(H2N5)	2625	2625	1	0	0.99	CY149638.1	2013-11-26
A/great black-backed gull/Iceland/1393/2011(H2N5)	NA	A/white-rumped sandpiper/Canada/2541/2011(H2N5)	2619	2619	1	0	0.99	CY149638.1	2013-11-26
A/herring gull/Iceland/1342/2011(H2N5)	NA	A/white-rumped sandpiper/Canada/2541/2011(H2N5)	2630	2630	1	0	0.99	CY149638.1	2013-11-26
A/herring gull/Iceland/1320/2011(H2N5)	NA	A/white-rumped sandpiper/Canada/2541/2011(H2N5)	2630	2630	1	0	0.99	CY149638.1	2013-11-26
A/great black-backed gull/Iceland/1110/2011(H5N2)	NA	A/duck/Italy/194659/2006(H3N2)	2470	2470	1	0	0.98	FJ432764.1	2013-11-26
A/lesser black-backed gull/Iceland/145/2010(H11N2)	NA	A/duck/Italy/194659/2006(H3N2)	2486	2486	0.99	0	0.98	FJ432764.1	2013-11-26
A/greylag goose/Iceland/1482/2011(H6N8)	NA	A/common eider/Netherlands/1/2006(H3N8)	2488	2488	0.99	0	0.98	CY041340.1	2013-11-26
A/greylag goose/Iceland/0911/2011(H6N8)	NA	A/common eider/Netherlands/1/2006(H3N8)	2488	2488	0.99	0	0.98	CY041340.1	2013-11-26
A/greylag goose/Iceland/0961/2011(H6N8)	NA	A/common eider/Netherlands/1/2006(H3N8)	2488	2488	0.99	0	0.98	CY041340.1	2013-11-26
A/pink-footed goose/Iceland/0987/2011(H6N8)	NA	A/common eider/Netherlands/1/2006(H3N8)	2488	2488	0.99	0	0.98	CY041340.1	2013-11-26
A/greylag goose/Iceland/0980/2011(H6N8)	NA	A/common eider/Netherlands/1/2006(H3N8)	2483	2483	0.99	0	0.98	CY041340.1	2013-11-26
A/greylag goose/Iceland/0976/2011(H6N8)	NA	A/common eider/Netherlands/1/2006(H3N8)	2483	2483	0.99	0	0.98	CY041340.1	2013-11-26
A/greylag goose/Iceland/0921/2011(H6N8)	NA	A/common eider/Netherlands/1/2006(H3N8)	2483	2483	0.99	0	0.98	CY041340.1	2013-11-26
A/greylag goose/Iceland/0926/2011(H6N8)	NA	A/common eider/Netherlands/1/2006(H3N8)	2483	2483	0.99	0	0.98	CY041340.1	2013-11-26
A/greylag goose/Iceland/1474/2011(H6N8)	NA	A/common eider/Netherlands/1/2006(H3N8)	2483	2483	0.99	0	0.98	CY041340.1	2013-11-26
A/greylag goose/Iceland/0953/2011(H6N5)	NA	A/mallard/Sweden/100103/2009(H12N5)	2532	2532	1	0	0.99	JX566218.1	2013-11-26
A/greylag goose/Iceland/0948/2011(H6N5)	NA	A/mallard/Sweden/100103/2009(H12N5)	2532	2532	1	0	0.99	JX566218.1	2013-11-26
A/greylag goose/Iceland/1459/2011(H6N5)	NA	A/mallard/Sweden/100103/2009(H12N5)	2543	2543	1	0	0.99	JX566218.1	2013-11-26
A/mallard/Iceland/1007/2011(H3N6)	NA	A/common pochard/Aktau/1455/2006(H4N6)	2521	2521	1	0	0.98	FJ434372.1	2013-11-26
A/great black-backed gull/Iceland/1113/2011(H4N8)	NP	A/bufflehead/Maine/287/2011(H4N8)	2826	2826	1	0	1	CY149583.1	2013-11-26
A/herring gull/Iceland/1359/2011(H2N5)	NP	A/ruddy turnstone/Canada/02937/2011(H3N5)	2839	2839	1	0	0.99	CY149647.1	2013-11-26
A/herring gull/Iceland/1342/2011(H2N5)	NP	A/ruddy turnstone/Canada/02937/2011(H3N5)	2839	2839	1	0	0.99	CY149647.1	2013-11-26
A/herring gull/Iceland/1320/2011(H2N5)	NP	A/ruddy turnstone/Canada/02937/2011(H3N5)	2839	2839	1	0	0.99	CY149647.1	2013-11-26
A/glaucous gull/Iceland/1382/2011(H2N5)	NP	A/ruddy turnstone/Canada/02937/2011(H3N5)	2839	2839	1	0	0.99	CY149647.1	2013-11-26
A/great black-backed gull/Iceland/1393/2011(H2N5)	NP	A/ruddy turnstone/Canada/02937/2011(H3N5)	2839	2839	1	0	0.99	CY149647.1	2013-11-26
A/herring gull/Iceland/1394/2011(H2N5)	NP	A/ruddy turnstone/Canada/02937/2011(H3N5)	2839	2839	1	0	0.99	CY149647.1	2013-11-26
A/herring gull/Iceland/1436/2011(H2N5)	NP	A/ruddy turnstone/Canada/02937/2011(H3N5)	2839	2839	1	0	0.99	CY149647.1	2013-11-26
A/glaucous gull/Iceland/1444/2011(H2N5)	NP	A/ruddy turnstone/Canada/02937/2011(H3N5)	2833	2833	1	0	0.99	CY149647.1	2013-11-26
A/great black-backed gull/Iceland/1395/2011(H2N5)	NP	A/ruddy turnstone/Canada/02937/2011(H3N5)	2833	2833	1	0	0.99	CY149647.1	2013-11-26
A/Iceland gull/Iceland/1124/2011(H2N5)	NP	A/ruddy turnstone/Canada/02937/2011(H3N5)	2826	2826	1	0	0.99	CY149647.1	2013-11-26
A/great black-backed gull/Iceland/1110/2011(H5N2)	NP	A/sharp-tailed sandpiper/Australia/6/2004(H11N9)	2656	2656	1	0	0.98	CY025200.1	2013-11-26
A/greylag goose/Iceland/0948/2011(H6N5)	NP	A/sharp-tailed sandpiper/Australia/6/2004(H11N9)	2615	2615	1	0	0.98	CY025200.1	2013-11-26
A/greylag goose/Iceland/0953/2011(H6N5)	NP	A/duck/Eastern China/34/2005(H6N1)	2588	2588	1	0	0.98	JF965199.1	2013-11-26
A/black-headed gull/Iceland/1298/2011(H10N5)	NP	A/longtail duck/Maryland/291/2005(H3N8)	2599	2599	1	0	0.97	CY017776.1	2013-11-26
A/black-headed gull/Iceland/713/2010(H16N3)	NP	A/greylag goose/Netherlands/1/1999(H6N2)	2490	2490	1	0	0.96	KF695215.1	2013-11-26
A/glaucous gull-herring gull hybrid/Iceland/1108/2011(H16N3)	NP	A/black-headed gull/Sweden/1/2005(H13N8)	2579	2579	1	0	0.98	CY077003.1	2013-11-26
A/greylag goose/Iceland/1474/2011(H6N8)	NP	A/mallard/Czech Republic/14333-1K/2011(H3N8)	2758	2758	1	0	0.99	JQ737214.1	2013-11-26
A/greylag goose/Iceland/0911/2011(H6N8)	NP	A/mallard/Czech Republic/14333-1K/2011(H3N8)	2758	2758	1	0	0.99	JQ737214.1	2013-11-26
A/greylag goose/Iceland/0921/2011(H6N8)	NP	A/mallard/Czech Republic/14333-1K/2011(H3N8)	2758	2758	1	0	0.99	JQ737214.1	2013-11-26
A/greylag goose/Iceland/0911/2011(H6N8)	NP	A/mallard/Czech Republic/14333-1K/2011(H3N8)	2758	2758	1	0	0.99	JQ737214.1	2013-11-26
A/greylag goose/Iceland/0961/2011(H6N8)	NP	A/mallard/Czech Republic/14333-1K/2011(H3N8)	2758	2758	1	0	0.99	JQ737214.1	2013-11-26
A/greylag goose/Iceland/0976/2011(H6N8)	NP	A/mallard/Czech Republic/14333-1K/2011(H3N8)	2758	2758	1	0	0.99	JQ737214.1	2013-11-26
A/pink-footed goose/Iceland/0987/2011(H6N8)	NP	A/mallard/Czech Republic/14333-1K/2011(H3N8)	2758	2758	1	0	0.99	JQ737214.1	2013-11-26
A/greylag goose/Iceland/0980/2011(H6N8)	NP	A/mallard/Czech Republic/14333-1K/2011(H3N8)	2752	2752	1	0	0.99	JQ737214.1	2013-11-26
A/greylag goose/Iceland/1482/2011(H6N8)	NP	A/mallard/Czech Republic/14333-1K/2011(H3N8)	2752	2752	1	0	0.99	JQ737214.1	2013-11-26
A/greylag goose/Iceland/1459/2011(H6N5)	NP	A/mallard/Czech Republic/14333-1K/2011(H3N8)	2752	2752	1	0	0.99	JQ737214.1	2013-11-26
A/mallard/Iceland/1007/2011(H3N6)	NP	A/mallard/Netherlands/29/2006(H7N2)	2712	2712	1	0	0.99	CY043835.1	2013-11-26
A/lesser black-backed gull/Iceland/145/2010(H11N2)	NP	A/mallard/Sweden/100537/2009(H6N2)	2675	2675	0.98	0	0.99	JX566086.1	2013-11-26
A/black-headed gull/Iceland/1298/2011(H10N5)	M	A/American black duck/New Brunswick/02653/2007(H4N6)	1773	1773	1	0	0.99	CY129222.1	2013-11-26
A/black-headed gull/Iceland/713/2010(H16N3)	M	A/Mongolian gull/Mongolia/405/2007(H13N6)	1746	1746	1	0	0.98	GQ907319.1	2013-11-26
A/glaucous gull-herring gull hybrid/Iceland/1108/2011(H16N3)	M	A/Mongolian gull/Mongolia/405/2007(H13N6)	1790	1790	1	0	0.99	GQ907319.1	2013-11-26
A/great black-backed gull/Iceland/1395/2011(H2N5)	M	A/ruddy turnstone/Canada/02937/2011(H3N5)	1797	1797	1	0	0.99	CY149645.1	2013-11-26
A/herring gull/Iceland/1394/2011(H2N5)	M	A/ruddy turnstone/Canada/02937/2011(H3N5)	1797	1797	1	0	0.99	CY149645.1	2013-11-26
A/great black-backed gull/Iceland/1393/2011(H2N5)	M	A/ruddy turnstone/Canada/02937/2011(H3N5)	1797	1797	1	0	0.99	CY149645.1	2013-11-26
A/glaucous gull/Iceland/1444/2011(H2N5)	M	A/ruddy turnstone/Canada/02937/2011(H3N5)	1797	1797	1	0	0.99	CY149645.1	2013-11-26
A/herring gull/Iceland/1320/2011(H2N5)	M	A/ruddy turnstone/Canada/02937/2011(H3N5)	1797	1797	1	0	0.99	CY149645.1	2013-11-26
A/Iceland gull/Iceland/1124/2011(H2N5)	M	A/ruddy turnstone/Canada/02937/2011(H3N5)	1797	1797	1	0	0.99	CY149645.1	2013-11-26
A/glaucous gull/Iceland/1382/2011(H2N5)	M	A/ruddy turnstone/Canada/02937/2011(H3N5)	1797	1797	1	0	0.99	CY149645.1	2013-11-26
A/herring gull/Iceland/1436/2011(H2N5)	M	A/ruddy turnstone/Canada/02937/2011(H3N5)	1797	1797	1	0	0.99	CY149645.1	2013-11-26
A/herring gull/Iceland/1359/2011(H2N5)	M	A/ruddy turnstone/Canada/02937/2011(H3N5)	1792	1792	1	0	0.99	CY149645.1	2013-11-26
A/herring gull/Iceland/1342/2011(H2N5)	M	A/ruddy turnstone/Canada/02937/2011(H3N5)	1792	1792	1	0	0.99	CY149645.1	2013-11-26
A/great black-backed gull/Iceland/1110/2011(H5N2)	M	A/mallard/Sweden/90/2005(H11N9)	1807	1807	1	0	0.99	CY076961.1	2013-11-26
A/great black-backed gull/Iceland/1113/2011(H4N8)	M	A/bufflehead/Maine/287/2011(H4N8)	1851	1851	1	0	1	CY149581.1	2013-11-26
A/greylag goose/Iceland/1474/2011(H6N8)	M	A/avian/Israel/824/2005(H10N2)	1818	1818	1	0	0.99	JN641305.1	2013-11-26
A/greylag goose/Iceland/0911/2011(H6N8)	M	A/avian/Israel/824/2005(H10N2)	1818	1818	1	0	0.99	JN641305.1	2013-11-26
A/greylag goose/Iceland/0926/2011(H6N8)	M	A/avian/Israel/824/2005(H10N2)	1818	1818	1	0	0.99	JN641305.1	2013-11-26
A/greylag goose/Iceland/0980/2011(H6N8)	M	A/avian/Israel/824/2005(H10N2)	1818	1818	1	0	0.99	JN641305.1	2013-11-26
A/greylag goose/Iceland/1482/2011(H6N8)	M	A/avian/Israel/824/2005(H10N2)	1812	1812	1	0	0.99	JN641305.1	2013-11-26
A/greylag goose/Iceland/0961/2011(H6N8)	M	A/avian/Israel/824/2005(H10N2)	1807	1807	1	0	0.99	JN641305.1	2013-11-26
A/pink-footed goose/Iceland/0987/2011(H6N8)	M	A/avian/Israel/824/2005(H10N2)	1807	1807	1	0	0.99	JN641305.1	2013-11-26
A/greylag goose/Iceland/0921/2011(H6N8)	M	A/avian/Israel/824/2005(H10N2)	1801	1801	1	0	0.99	JN641305.1	2013-11-26
A/greylag goose/Iceland/0976/2011(H6N8)	M	A/avian/Israel/824/2005(H10N2)	1786	1786	1	0	0.99	JN641305.1	2013-11-26
A/greylag goose/Iceland/0948/2011(H6N5)	M	A/mallard/Sweden/90/2005(H11N9)	1770	1770	1	0	0.99	CY076961.1	2013-11-26
A/greylag goose/Iceland/0953/2011(H6N5)	M	A/mallard/Sweden/90/2005(H11N9)	1766	1766	1	0	0.99	CY076961.1	2013-11-26
A/greylag goose/Iceland/1459/2011(H6N5)	M	A/mallard/Sweden/90/2005(H11N9)	1770	1770	1	0	0.99	CY076961.1	2013-11-26
A/mallard/Iceland/1007/2011(H3N6)	M	A/mallard/Sweden/90/2005(H11N9)	1796	1796	1	0	0.99	CY076961.1	2013-11-26
A/lesser black-backed gull/Iceland/145/2010(H11N2)	M	A/mallard/Bavaria/185-26/2008(H1N1)	1779	1779	0.99	0	0.99	HQ259235.1	2013-11-26
A/black-headed gull/Iceland/1298/2011(H10N5)	NS	A/common gull/Ust-Ilimsk/121/2008	1487	1487	1	0	0.98	CY080586.1	2013-11-26
A/lesser black-backed gull/Iceland/145/2010(H11N2)	NS	A/common gull/Ust-Ilimsk/121/2008	1496	1496	1	0	0.98	CY080586.1	2013-11-26
A/black-headed gull/Iceland/713/2010(H16N3)	NS	A/black headed gull/Mongolia/1756/2006(H16N3)	1515	1515	1	0	0.98	GQ907298.2	2013-11-26
A/herring gull/Iceland/1359/2011(H2N5)	NS	A/white-rumped sandpiper/Canada/2541/2011(H2N5)	1598	1598	1	0	1	CY149640.1	2013-11-26
A/Iceland gull/Iceland/1124/2011(H2N5)	NS	A/white-rumped sandpiper/Canada/2541/2011(H2N5)	1598	1598	1	0	1	CY149640.1	2013-11-26
A/glaucous gull/Iceland/1382/2011(H2N5)	NS	A/white-rumped sandpiper/Canada/2541/2011(H2N5)	1598	1598	1	0	1	CY149640.1	2013-11-26
A/great black-backed gull/Iceland/1393/2011(H2N5)	NS	A/white-rumped sandpiper/Canada/2541/2011(H2N5)	1598	1598	1	0	1	CY149640.1	2013-11-26
A/glaucous gull/Iceland/1444/2011(H2N5)	NS	A/white-rumped sandpiper/Canada/2541/2011(H2N5)	1598	1598	1	0	1	CY149640.1	2013-11-26
A/herring gull/Iceland/1342/2011(H2N5)	NS	A/white-rumped sandpiper/Canada/2541/2011(H2N5)	1580	1580	1	0	1	CY149640.1	2013-11-26
A/herring gull/Iceland/1320/2011(H2N5)	NS	A/white-rumped sandpiper/Canada/2541/2011(H2N5)	1580	1580	1	0	1	CY149640.1	2013-11-26
A/herring gull/Iceland/1394/2011(H2N5)	NS	A/white-rumped sandpiper/Canada/2541/2011(H2N5)	1580	1580	1	0	1	CY149640.1	2013-11-26
A/great black-backed gull/Iceland/1395/2011(H2N5)	NS	A/white-rumped sandpiper/Canada/2541/2011(H2N5)	1574	1574	1	0	0.99	CY149640.1	2013-11-26
A/herring gull/Iceland/1436/2011(H2N5)	NS	A/white-rumped sandpiper/Canada/2541/2011(H2N5)	1574	1574	1	0	0.99	CY149640.1	2013-11-26
A/great black-backed gull/Iceland/1110/2011(H5N2)	NS	A/mallard/Czech Republic/14333-1K/2011(H3N8)	1546	1546	1	0	0.99	JQ737217.1	2013-11-26
A/great black-backed gull/Iceland/1113/2011(H4N8)	NS	A/bufflehead/Maine/287/2011(H4N8)	1598	1598	1	0	1	CY149584.1	2013-11-26
A/greylag goose/Iceland/0921/2011(H6N8)	NS	A/mallard/Czech Republic/15902-18K/2009(H11N9)	1552	1552	1	0	0.99	JF682625.1	2013-11-26
A/greylag goose/Iceland/0961/2011(H6N8)	NS	A/mallard/Czech Republic/15902-18K/2009(H11N9)	1552	1552	1	0	0.99	JF682625.1	2013-11-26
A/greylag goose/Iceland/0980/2011(H6N8)	NS	A/mallard/Czech Republic/15902-18K/2009(H11N9)	1552	1552	1	0	0.99	JF682625.1	2013-11-26
A/greylag goose/Iceland/1474/2011(H6N8)	NS	A/mallard/Czech Republic/15902-18K/2009(H11N9)	1552	1552	1	0	0.99	JF682625.1	2013-11-26
A/greylag goose/Iceland/0911/2011(H6N8)	NS	A/mallard/Czech Republic/15902-18K/2009(H11N9)	1552	1552	1	0	0.99	JF682625.1	2013-11-26
A/greylag goose/Iceland/0926/2011(H6N8)	NS	A/mallard/Czech Republic/15902-18K/2009(H11N9)	1552	1552	1	0	0.99	JF682625.1	2013-11-26
A/greylag goose/Iceland/0976/2011(H6N8)	NS	A/mallard/Czech Republic/15902-18K/2009(H11N9)	1552	1552	1	0	0.99	JF682625.1	2013-11-26
A/pink-footed goose/Iceland/0987/2011(H6N8)	NS	A/mallard/Czech Republic/15902-18K/2009(H11N9)	1552	1552	1	0	0.99	JF682625.1	2013-11-26
A/greylag goose/Iceland/1482/2011(H6N8)	NS	A/mallard/Czech Republic/15902-18K/2009(H11N9)	1546	1546	1	0	0.99	JF682625.1	2013-11-26
A/greylag goose/Iceland/0953/2011(H6N5)	NS	A/mallard/Sweden/54/2003(H6N1)	1565	1565	1	0	0.99	KF695227.1	2013-11-26
A/greylag goose/Iceland/0948/2011(H6N5)	NS	A/mallard/Sweden/54/2003(H6N1)	1565	1565	1	0	0.99	KF695227.1	2013-11-26
A/greylag goose/Iceland/1459/2011(H6N5)	NS	A/mallard/Sweden/54/2003(H6N1)	1565	1565	1	0	0.99	KF695227.1	2013-11-26
A/glaucous gull-herring gull hybrid/Iceland/1108/2011(H16N3)	NS	A/common gull/Norway/10_1313/2009(H13N2)	1546	1546	0.98	0	0.99	HE802719.1	2013-11-26
A/mallard/Iceland/1007/2011(H3N6)	NS	A/dunlin/Sweden/1/2005(H4N6)	1548	1548	1	0	0.99	CY076988.1	2013-11-26
